# Supplementary material for: Achieving high response of perovskite-based (MAPbI3) ammonia gas sensors at room temperature via light enhancement
Source: Royal Society of Chemistry journal article supplement (doi:10.1039/d4tc04522j), 2025-01-01
Supplement: d4tc04522j1.pdf [file d4tc04522j1.pdf]

## Supplementary Information

Achieving high response of perovskite-based ( $\text{MAPbI}_3$ ) ammonia gas sensors at room temperature via light enhancement.

Chih-Chien Lee,<sup>a,\*</sup> Ade Kurniawan,<sup>a,b</sup> Johan Iskandar,<sup>b,c</sup> Cheng-Shane Chu,<sup>d</sup> Chih-Yi Liu<sup>b,e,\*\*</sup>

<sup>a</sup> Department of Electronic Engineering, National Taiwan University of Science and Technology, Taipei City 106335, Taiwan

<sup>b</sup> Organic Electronics Research Centre, Ming Chi University of Technology, New Taipei City 243303, Taiwan

<sup>c</sup> Vocational School, Pakuan University, West Java, 16143, Indonesia

<sup>d</sup> Department of Mechanical Engineering, Ming Chi University of Technology, New Taipei City 243303, Taiwan

<sup>e</sup> College of Engineering, Ming Chi University of Technology, New Taipei City, 243303, Taiwan

\*cclee@mail.ntust.edu.tw

\*\*liu.chihyi@mail.mcut.edu.tw

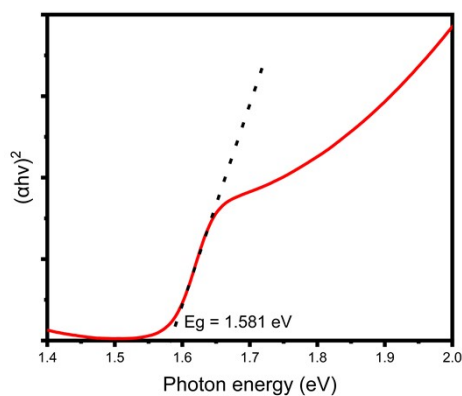

Figure. S1. Tauc plot of a typical  $\text{MAPbI}_3$  film deposited on an ITO glass substrate.

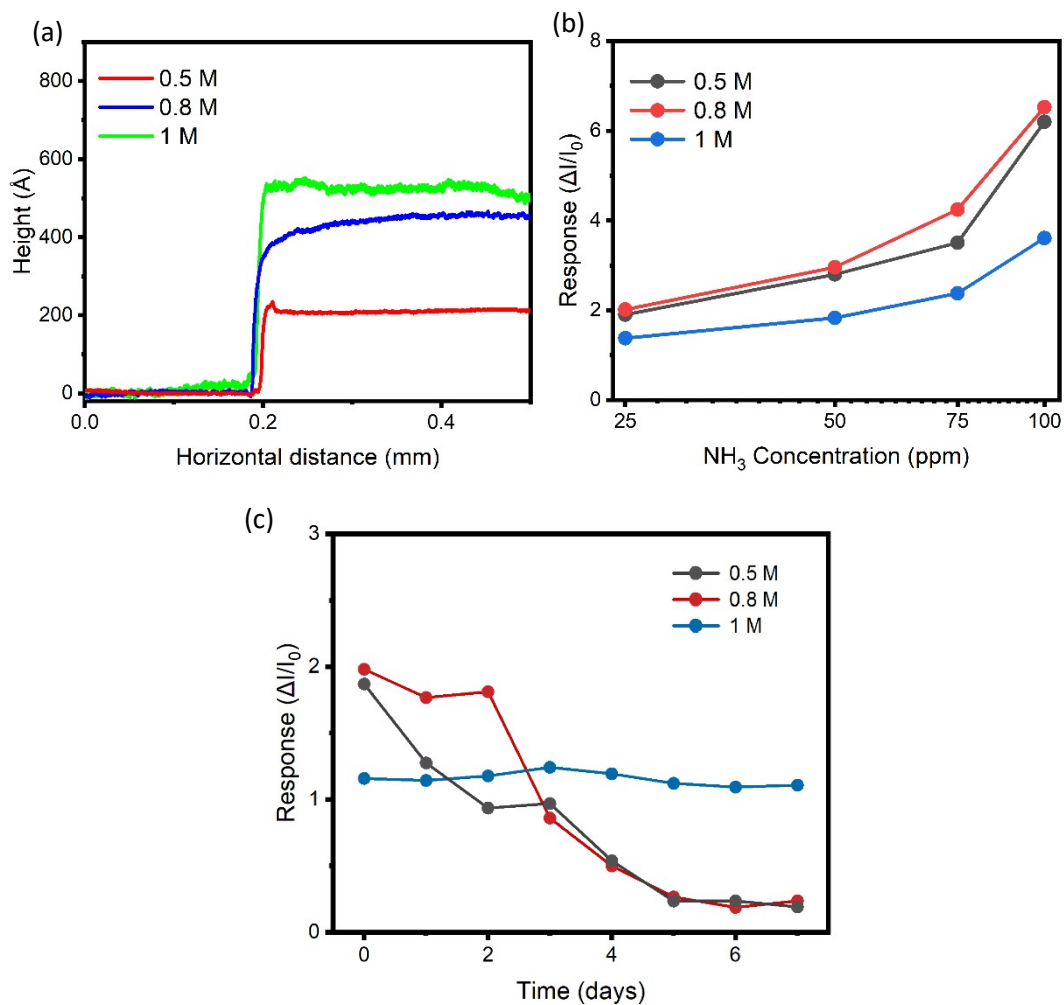

**Figure S2.** (a) Thickness of MAPbI<sub>3</sub> films prepared with varying concentrations of MAPbI<sub>3</sub> precursor solution, measured using a Bruker DektakXT profilometer. (b) Response and (c) long-term stability of gas sensors fabricated using different concentrations of MAPbI<sub>3</sub> precursor solution under exposure to 25 ppm NH<sub>3</sub>.

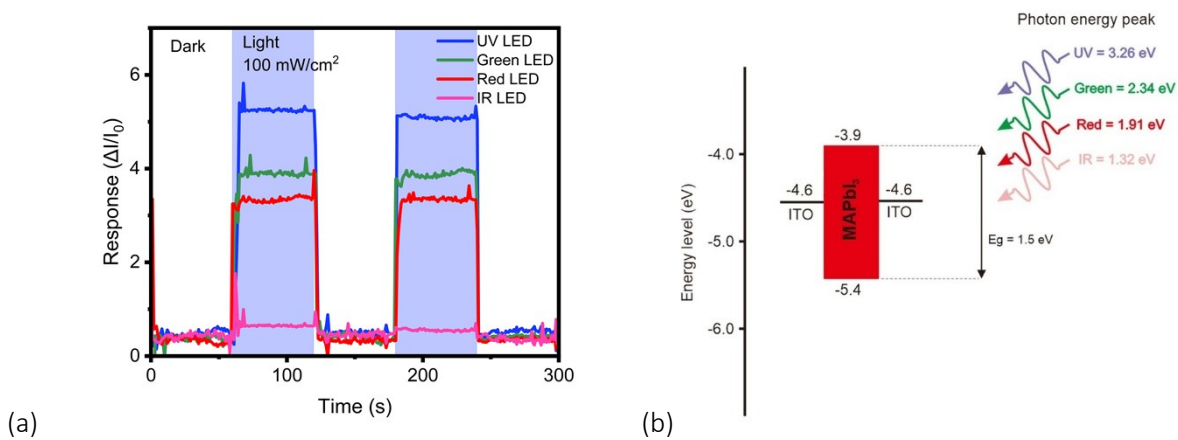

**Figure. S3.** (a) Dynamic response of the MAPbI<sub>3</sub> gas sensor under different illumination conditions. (b) Band energy levels of the MAPbI<sub>3</sub> film and the photon energy peak of the LED (calculated using the energy equation  $E = hc/\lambda$ , where  $\lambda$  is the LED emission peak).

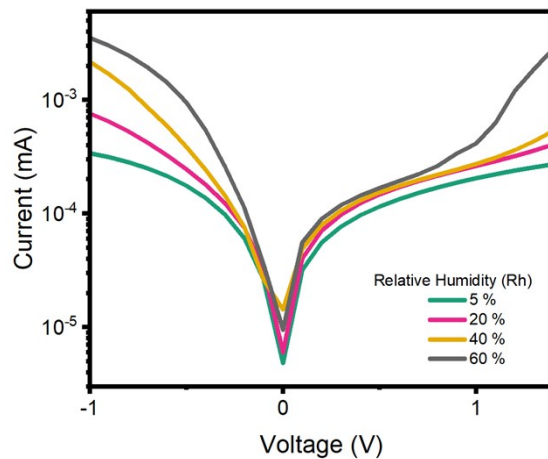

**Figure. S4.** I-V curves of the MAPbI<sub>3</sub> gas sensor under dark conditions at various relative humidity levels.

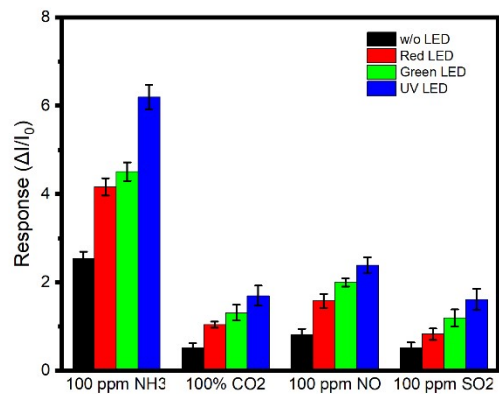

**Figure. S5.** Selectivity response of the MAPbI<sub>3</sub> gas sensor to 100 ppm of various gases under 100 mW/cm<sup>2</sup> light illumination with an applied bias of 1.5 V.

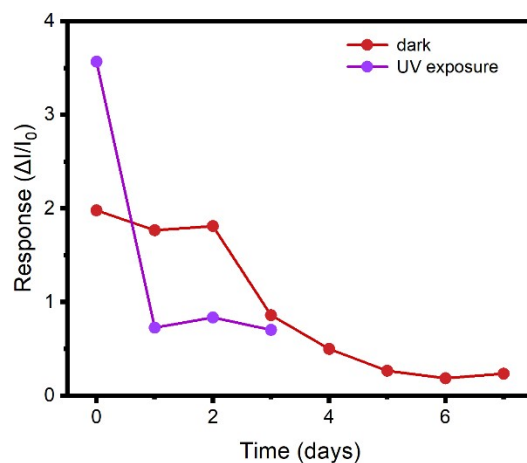

**Figure. S6.** Long-term stability of the MAPbI<sub>3</sub> gas sensor under 100 ppm NH<sub>3</sub> in the dark and with 100 mW/cm<sup>2</sup> UV light illumination.
